# Supplementary material for: A paper based self-pumping and self-breathing fuel cell using pencil stroked graphite electrodes
Source: Royal Society of Chemistry journal article supplement (doi:10.1039/c4lc00029c), 2014-01-01
Supplement: c4lc00029c1.pdf [file c4lc00029c1.pdf]

## Electronic Supplementary Information

### 1. SEM images of paper and graphite coated electrodes

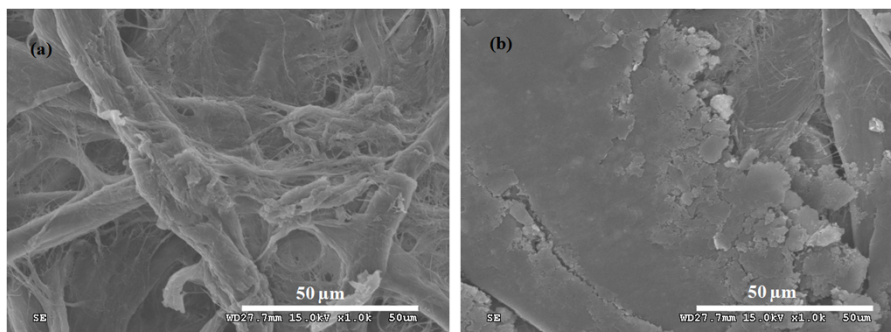

**Figure S1:** Scanning electron microscopic image of the paper (a) before and (b) after stroking with Hb pencil ( $k = 35$ ) to be used as graphite electrodes.

### 2. CO<sub>2</sub> gas bubble removal from the paper surface during re-dox reaction

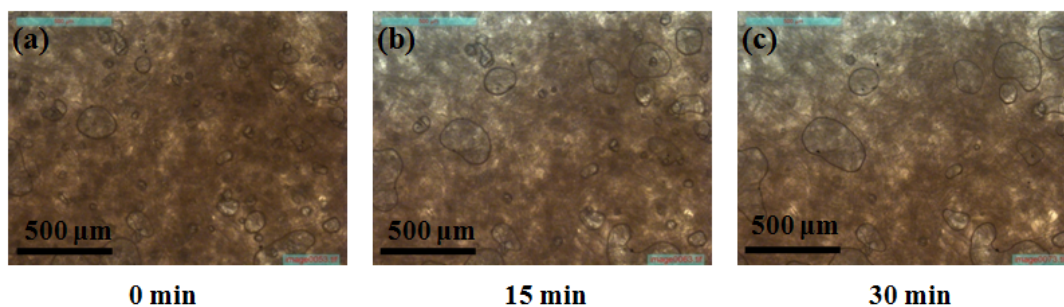

**Figure S2:** Microscopic images of paper fuel cell showing removal of CO<sub>2</sub> gas bubbles to the atmosphere with respect to time.

### 3. Interface development between the fuel and electrolyte solutions and the proton concentration gradient

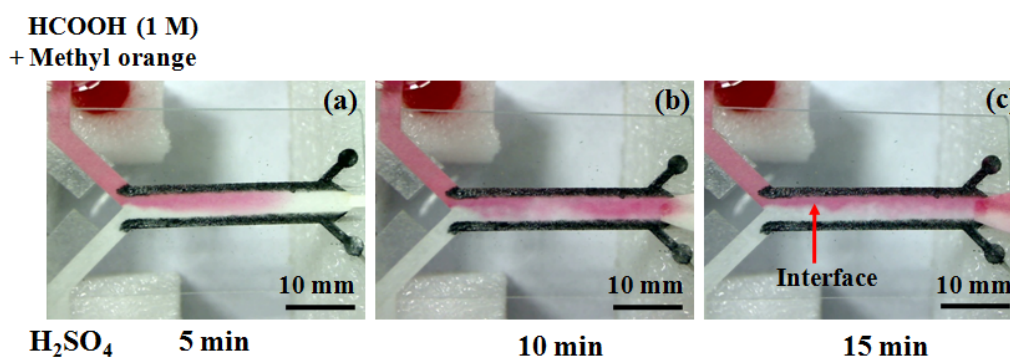

**Figure S3:** Snapshots of interface development after (a) 5 min, (b) 10 min and (c) 15 min in paper fuel cell and proton concentration gradient due to the interfacial transfer.

**4. Open circuit potential of the paper fuel cell to show its energy generating capacity for long time**

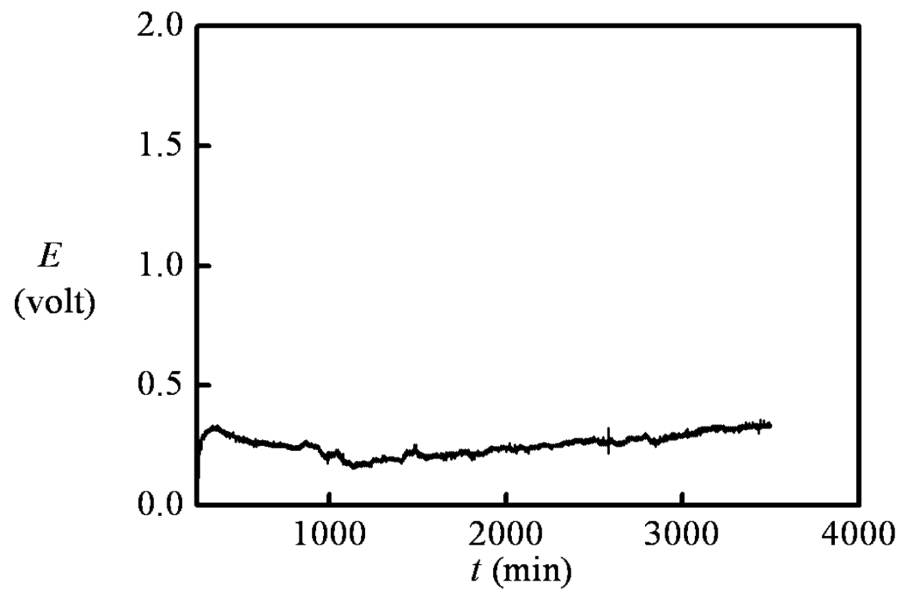

**Figure S4:** The open circuit potential ( $E$ ) is measured with respect to time ( $t$ ) = 3500 minutes at the consumption of  $\sim 2.5$  ml fuel. The outlet paper reservoir ( $5\text{ cm} \times 2\text{ cm}$ ) is replaced after 1000 minutes to ensure the fresh supply of the fuel and electrolyte solutions.
